# Supplementary material for: A role for Mfb1p in region-specific anchorage of high-functioning mitochondria and lifespan in Saccharomyces cerevisiae
Source: PubMed Central journal article supplement (PMC4742906; doi:10.1038/ncomms10595), 2016-02-03
Supplement: ncomms10595-s1.pdf [file ncomms10595-s1.pdf]

## Supplementary Figures:

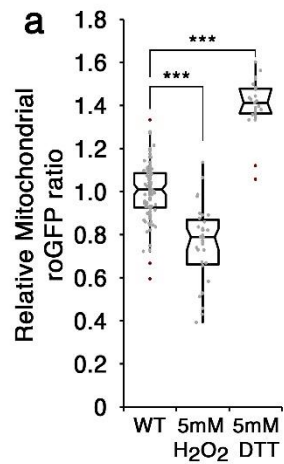

**Supplementary Figure 1: roGFP allows ratiometric assessment of mitochondrial redox state a)** Notched box plot of the average reduced/oxidized mito-roGFP1 ratio in WT cells treated with H<sub>2</sub>O<sub>2</sub> (5 mM) or DTT (5 mM) relative to untreated cells. n > 40 cells per condition. The central band in the box represents the median, boxes indicate the middle quartiles, and whiskers extend to the 5<sup>th</sup> and 95<sup>th</sup> percentiles; red dots indicate data points beyond this range. Statistical significance was determined using the Student's t-test. \* p < 0.05, \*\* p < 0.01, \*\*\* p < 0.005.

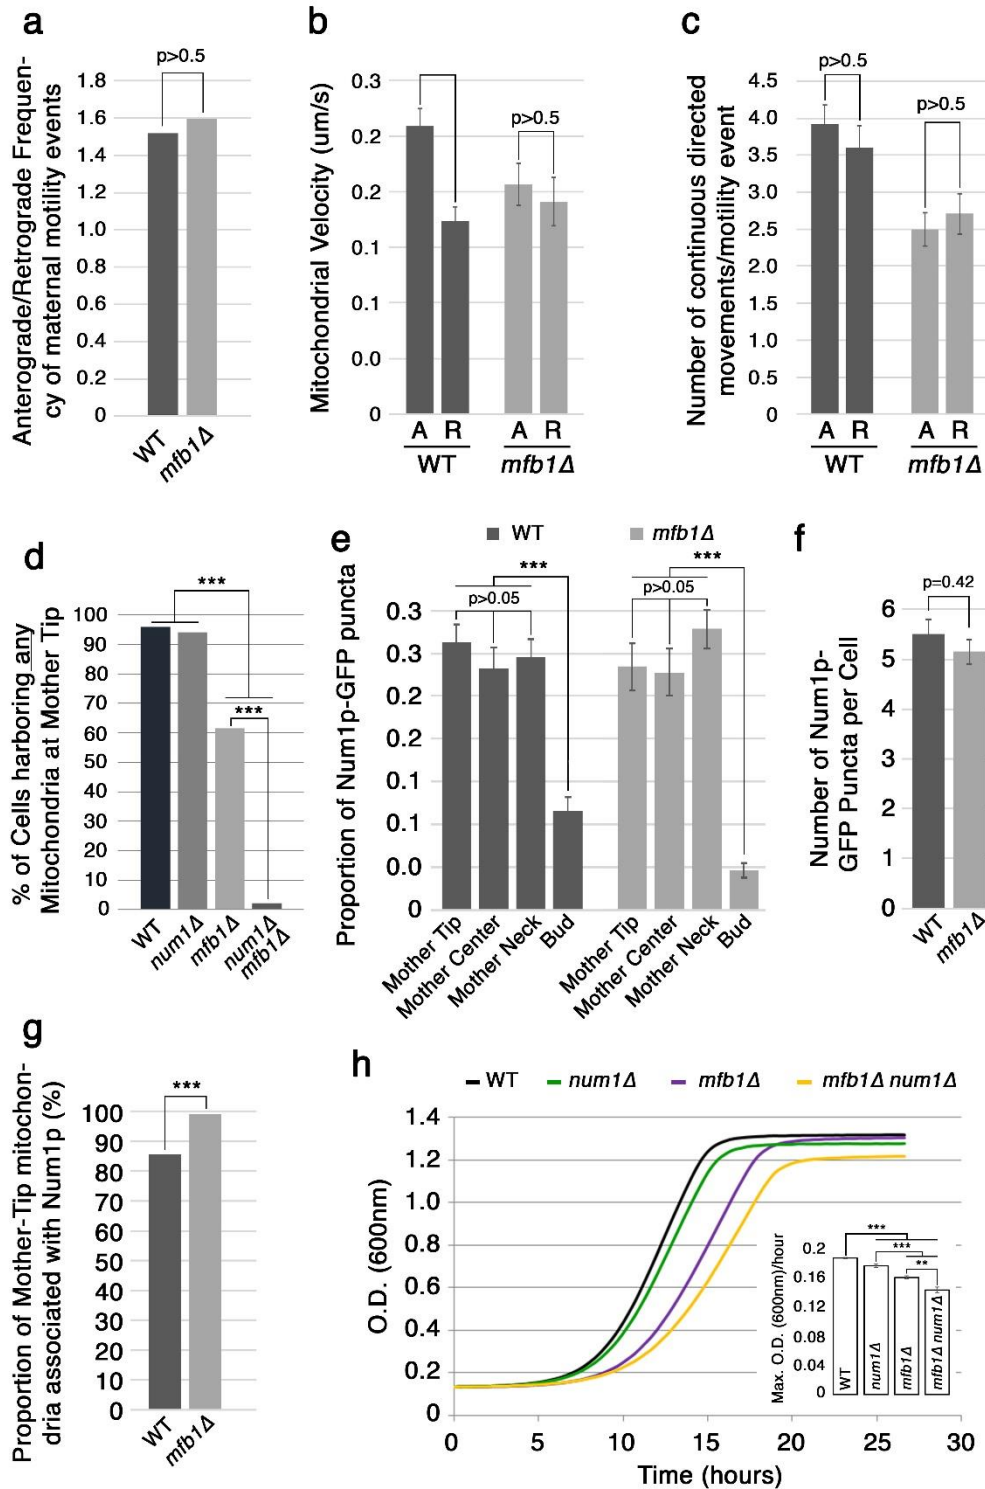

**Supplementary Figure 2: Independent function of Num1p and Mfb1p** a-c. To test for changes in motility upon deletion of MFB1 that could explain the lack of mitochondrial accumulation at the mother tip (either increased anterograde trafficking or decreased retrograde trafficking), **a**) ratio of frequency of anterograde events to that of retrograde events, **b**) velocity and **c**) processivity of anterograde and

retrograde mitochondrial motility events were measured in cells expressing Cit1p-mCherry. Z-series were collected every 1 s for 30 s and analyzed as described in Experimental Procedures. **d)** The prevalence of mitochondrial localization to the mother tip was quantified in WT, *num1Δ*, *mfb1Δ* and *num1Δ mfb1Δ* cells expressing Cit1p-mCherry (n > 80). **e)** Relative Num1p-puncta distribution in WT and *mfb1Δ* cells expressing Num1p-GFP in 3 areas of the dividing mother cell (see Fig.1b) and the bud. **f)** Total number of Num1p-GFP puncta per cell. **g)** Proportion of WT and *mfb1Δ* cells displaying Cit1p-mCherry at the mother tip in which in which colocalized Num1p-GFP puncta were also observed (n > 80). **d-g.** Data is representative of three independent experiments. **h)** Growth of WT, *num1Δ*, *mfb1Δ* and *num1Δ mfb1Δ* cells in YPD medium at 30°C. Maximum growth rates were calculated for intervals of 2h. Error bars represent standard errors of the mean. Statistical significance was determined using Fisher's exact test (d,g) or Student's *t*-test. \* p < 0.05, \*\* p < 0.01, \*\*\* p < 0.005.

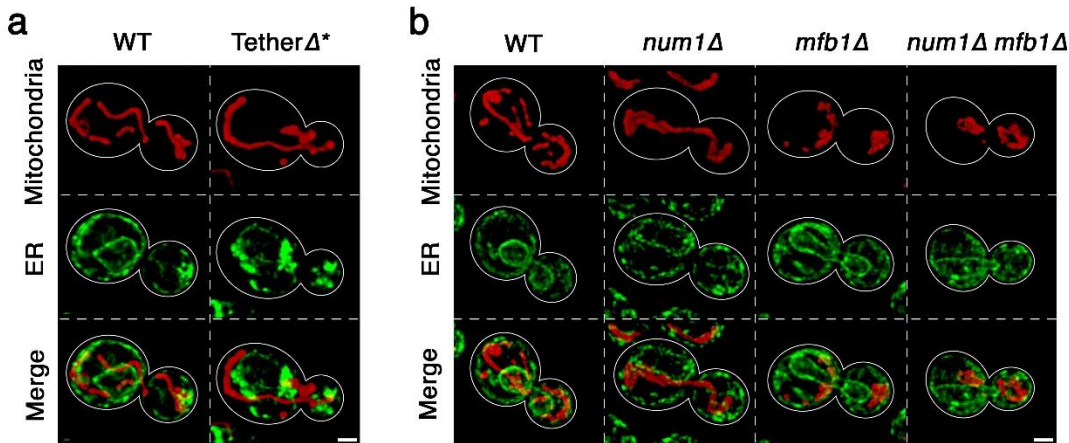

**Supplementary Figure 3: Mitochondrial tethering occurs independent of cER** **a)** Mitochondria accumulate at the mother tip despite loss of cortical ER. Representative 3D renderings of WT and TetherΔ (*Ist2Δ*, *Tcb1/2/3Δ*, *Scs2Δ* and *Scs22Δ*) cells expressing Cit1p-mCherry (mitochondria) and Pho88-CFP and Pho88-YFP (ER) respectively. **b)** Cortical ER is present at mother cell retention sites in *mfb1Δ* and *num1Δ* cells even when mitochondria fail to accumulate there. Representative 3D renderings of WT, *num1Δ*, *mfb1Δ* and *num1Δ mfb1Δ* cells expressing Cit1p-mCherry (mitochondria) and Pho88p-GFP (ER). **a-b.** Cell outlines are shown in white; scale bars = 1 μm.

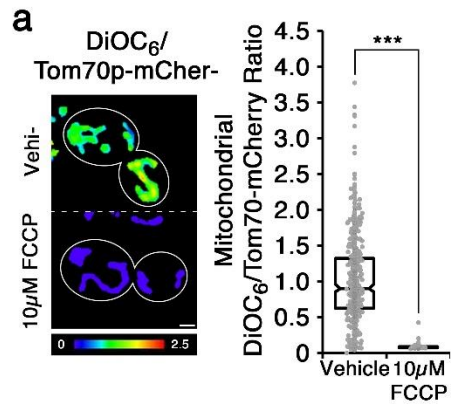

**Supplementary Figure 4: The DiOC<sub>6</sub>/Tom70p-mCherry ratio allows assessment of mitochondrial membrane potential a)** Mid-log-phase cells expressing Tom70p-mCherry were labeled with DiOC<sub>6</sub> as described in Experimental Procedures. To determine the sensitivity of the DiOC<sub>6</sub>/Tom70p-mCherry ratio to mitochondrial membrane potential, cells were treated with 10 μM FCCP or vehicle (DMSO). Panels show representative images and quantitation of the whole-cell mitochondrial DiOC<sub>6</sub>/Tom70p-mCherry ratio ( $n > 40$ ); warmer colors and higher numbers indicate higher mitochondrial membrane potential. The central band in the box represents the median, boxes indicate the middle quartiles, and whiskers extend to the 5<sup>th</sup> and 95<sup>th</sup> percentiles; red dots indicate data points beyond this range. Statistical significance was determined using the Wilcoxon Rank-Sum test. \*  $p < 0.05$ , \*\*  $p < 0.01$ , \*\*\*  $p < 0.005$ . Cell Outlines are shown in white.

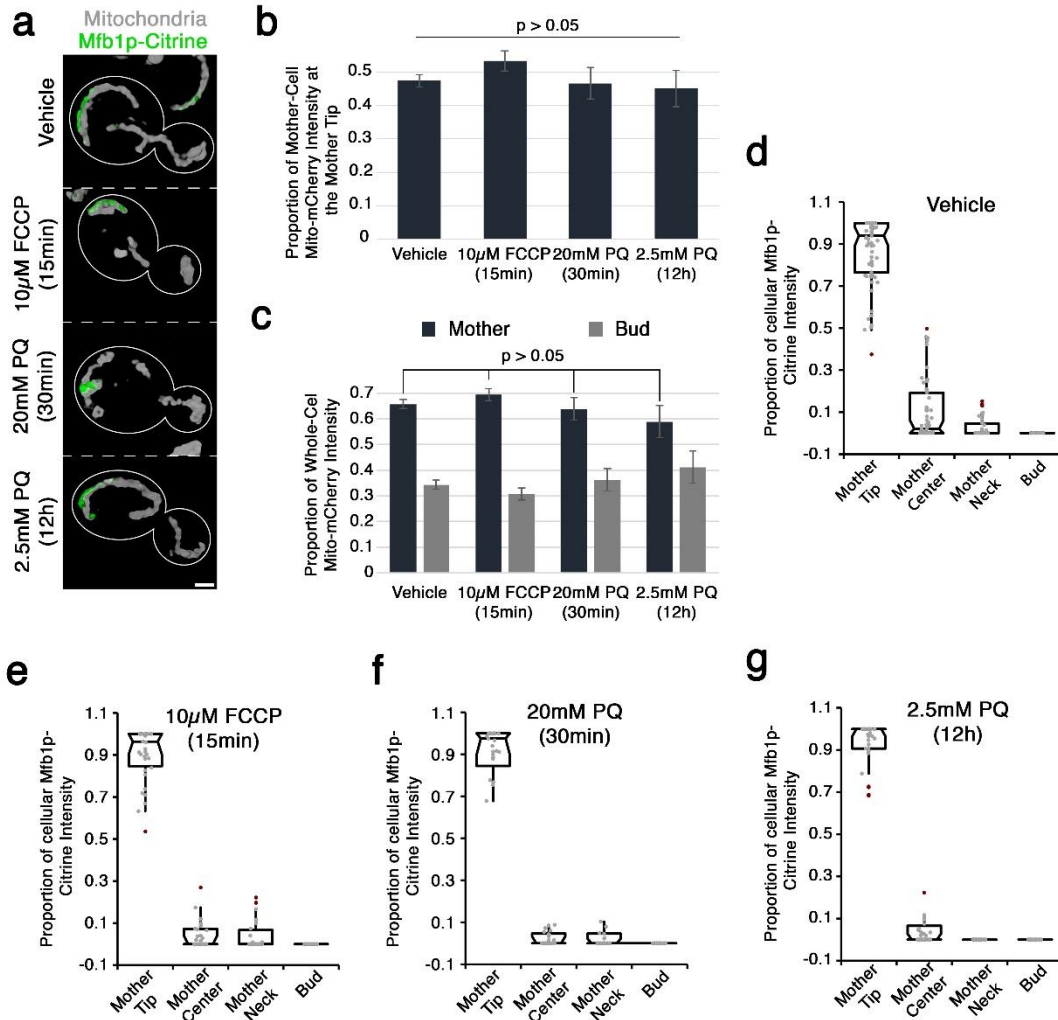

**Supplementary Figure 5: Mfb1p localization is not sensitive to oxidative stress or loss of mitochondrial membrane potential a-g**. Cells expressing Tom70p-mCherry and Mfb1-Citrine were grown to mid-log phase, treated with vehicle or drug, and visualized by fluorescence microscopy. **a**) Representative 3D renderings of mitochondria and Mfb1p-Citrine after treatment with FCCP or acute or chronic paraquat (PQ). Cell outlines are shown in white. Scale bars = 1 µm. **b**) Cit1p-mCherry intensity at the mother tip, expressed as a proportion of the total intensity in the mother cell. **c**) Cit1p-mCherry intensity in mother and daughter, expressed as a proportion of the total intensity in the entire cell (mother + daughter), after FCCP and PQ treatment. Error bars indicate standard errors of the mean ( $n > 40$  for each condition). **d-g**) Relative distribution of Mfb1p-Citrine after FCCP and PQ treatment ( $n > 40$  for each condition). The central band in the box represents the median, boxes indicate the middle quartiles, and whiskers extend to the 5<sup>th</sup> and 95<sup>th</sup> percentiles; red dots indicate data points beyond this range. Statistical significance was determined using Student's *t*-test. \*  $p < 0.05$ , \*\*  $p < 0.01$ , \*\*\*  $p < 0.005$ .

## Supplementary Tables:

**Supplementary Table 1: Strains used in this study**

| <b>Strains</b> | <b>Genotype</b>                                                                                             | <b>Source</b>         |
|----------------|-------------------------------------------------------------------------------------------------------------|-----------------------|
| BY4741         | <i>MATa his3Δ1 leu2Δ0 met15Δ0 ura3Δ0</i>                                                                    | Open Biosystems       |
| WPY0005        | <i>MATa his3Δ1 leu2Δ0 met15Δ0 ura3Δ1 CIT1-mCherry-hphMX4</i>                                                | This Study            |
| WPY0006        | <i>MATa his3Δ1 leu2Δ0 met15Δ0 ura3Δ2 CIT1-mCherry-hphMX4 mfb1Δ::kanMX6</i>                                  | This Study            |
| WPY0007        | <i>MATa his3Δ1 leu2Δ0 met15Δ0 ura3Δ3 CIT1-mCherry-hphMX4 mmr1Δ::LEU2</i>                                    | This Study            |
| WPY0008        | <i>MATa his3Δ1 leu2Δ0 met15Δ0 ura3Δ5 CIT1-mCherry-hphMX4 mfb1Δ::kanMX6 mmr1Δ::LEU2</i>                      | This Study            |
| WPY0013        | <i>MATa his3Δ1 leu2Δ0 met15Δ0 ura3Δ5 CIT1-mCherry-hphMX4 PHO88-GFP(S65T)-KanMX6</i>                         | This Study            |
| WPY0014        | <i>MATa his3Δ1 leu2Δ0 met15Δ0 ura3Δ5 CIT1-mCherry-hphMX4 PHO88-GFP(S65T)-KanMX6 mfb1Δ::LEU2</i>             | This Study            |
| WPY0023        | <i>MATa his3Δ1 leu2Δ0 met15Δ0 ura3Δ5 CIT1-mCherry-hphMX4 PHO88-GFP(S65T)-KanMX6 num1Δ::LEU2</i>             | This Study            |
| WPY0024        | <i>MATa his3Δ1 leu2Δ0 met15Δ0 ura3Δ5 CIT1-mCherry-hphMX4 PHO88-GFP(S65T)-KanMX6 num1Δ::LEU2 mfb1Δ::URA3</i> | This Study            |
| WPY0015        | <i>MATa his3Δ1 leu2Δ0 met15Δ0 ura3Δ9 [pMito-roGFP1:URA3]</i>                                                | This Study            |
| WPY0016        | <i>MATa his3Δ1 leu2Δ0 met15Δ0 ura3Δ10 mfb1Δ::LEU3 [pMito-roGFP:URA3]</i>                                    | This Study            |
| WPY0017        | <i>MATa his3Δ1 leu2Δ0 met15Δ0 ura3Δ10 mmr1Δ::LEU3 [pMito-roGFP:URA3]</i>                                    | This Study            |
| WPY0018        | <i>MATa his3Δ1 leu2Δ0 met15Δ0 ura3Δ10 mmr1Δ::LEU3 mfb1Δ::KanMX6 [pMito-roGFP:URA3]</i>                      | This Study            |
| JVY:66         | <i>MATa his3Δ1 leu2Δ0 met15Δ0 ura3Δ10 CIT1-mCherry-hphMX4 MFB1-GFP-KanMX6</i>                               | This Study            |
| WPY0048        | <i>MATa his3Δ1 leu2Δ0 met15Δ0 ura3Δ10 CIT1-mCherry-hphMX4 MFB1-GFP-KanMX6 num1Δ::LEU3</i>                   | This Study            |
| WPY0105        | <i>MATa his3Δ1 leu2Δ0 met15Δ0 ura3Δ10 CIT1-mCherry-hphMX4 NUM1-GFP-KanMX6</i>                               | This Study            |
| WPY0106        | <i>MATa his3Δ1 leu2Δ0 met15Δ0 ura3Δ10 CIT1-mCherry-hphMX4 NUM1-GFP-KanMX6 mfb1Δ::URA3</i>                   | This Study            |
| WPY0067-1      | <i>MATa his3Δ1 leu2Δ0 met15Δ0 ura3Δ17 TOM70-mCherry-hphMX4</i>                                              | This Study            |
| WPY067         | <i>MATa his3Δ1 leu2Δ0 met15Δ0 ura3Δ17 TOM70-mCherry-hphMX4 mfb1Δ::KanMX6</i>                                | This Study            |
| WPY0068        | <i>MATa his3Δ1 leu2Δ0 met15Δ0 ura3Δ17 TOM70-mCherry-hphMX4 mmr1Δ::LEU2</i>                                  | This Study            |
| WPY0069        | <i>MATa his3Δ1 leu2Δ0 met15Δ0 ura3Δ17 TOM70-mCherry-hphMX4 mfb1Δ::KanMX6 mmr1Δ::LEU2</i>                    | This Study            |
| SEY6210.1      | <i>MATa leu2-3,112 ura3-52 his3-Δ 200 trp1-Δ901 lys2-801 suc2-Δ9</i>                                        | Robinson et al., 1988 |

|         |                                                                                                                                                        |                      |
|---------|--------------------------------------------------------------------------------------------------------------------------------------------------------|----------------------|
| ANDY201 | <i>SEY6210.1 SEC61-GFP::TRP1 ist2Δ::HISMX6 scs2Δ::TRP1 scs22Δ::HISMX6 tcb1Δ::KANMX6 tcb2Δ::KANMX6 tcb3Δ::HISMX6</i>                                    | Manford et al., 2012 |
| WPY0031 | <i>MATa leu2-3,112 ura3-52 his3-Δ 200 trp1-Δ901 lys2-801 suc2-Δ9 CIT1-mCherry-hphMX4 PHO88-CFP-LEU2</i>                                                | This Study           |
| WPY0032 | <i>SEY6210.1 SEC61-GFP::TRP1 ist2Δ::HISMX6 scs2Δ::TRP1 scs22Δ::HISMX6 tcb1Δ::KANMX6 tcb2Δ::KANMX6 tcb3Δ::HISMX6 CIT1-mCherry-hphMX4 PHO88-YFP-LEU2</i> | This Study           |

**Supplementary Table 2: Primers used in this study**

| Name                                | Sequence                                                              |
|-------------------------------------|-----------------------------------------------------------------------|
| FW <i>MFB1</i> deletion             | CCAACACAGTCTTCATACACTATTATTATTCATTTTATGGcggatccccgggtaattaa           |
| RV <i>MFB1</i> deletion             | CGTATAGTAGCTCTTTTTTTGTATCGATTTATAAAAATGCgaattcgagctcgttaaac           |
| FW <i>MFB1</i> deletion POM         | CCAACACAGTCTTCATACACTATTATTATTCATTTTATGGacgctgcaggtcgacaaccc          |
| RV <i>MFB1</i> deletion POM         | CGTATAGTAGCTCTTTTTTTGTATCGATTTATAAAAATGCttaagggttctcgagagctc          |
| FW <i>MMR1</i> deletion pOM         | AAAAAAAAAAACACAACAACTAATAAACTAAACAACAACTAAAAAacgctgcaggtcgacaaccc     |
| RV <i>MMR1</i> deletion pOM         | GTTTGTGTAATAAAGTTAATTTAATTTGAAGTTGACGCTttaagggttctcgagagctc           |
| FW <i>NUM1</i> deletion pOM         | CTAATAGGACCACAGGGTTGAATAGAGACGAGTAAAGACGacgctgcaggtcgacaaccc          |
| RV <i>NUM1</i> deletion pOM         | TACTCATCGGTGGCAAACGTGTTTACAGGACTAAAAATCGttaagggttctcgagagctc          |
| FW <i>PHO88</i> tag                 | AGAAGCTGAAAGAGCCGGTAACGCTGGTGTTAAGGCTGAAggtgacggtgctggttta            |
| RV <i>PHO88</i> tag                 | TTCTATGGCGATGTAGGAAAATAGACACAATTCGTCTAGCcatcgatgaattcgagctcg          |
| FW linker-YFP pWJ1863               | GGTGACGGTGCTGGTTTAATTAACAGTatgagtaaaggagaagaacttttactgg               |
| FW nested <i>PHO88</i> -tag pWJ1863 | AGAAGCTGAAAGAGCCGGTAACGCTGGTGTTAAGGCTGAAggtgacggtgctggtttaattaaac agt |
| RV <i>PHO88</i> tag                 | AAAACCTAGGAAAAAAAAAATACTTCGCTTTTGTATCGAATCAatcgatgaattcgagctcg        |
| FW <i>NUM1</i> -tag pFA6            | ACATAGAGTACCACAAAGCCGATCATTTGGCAATTTACGAcggatccccgggtaattaa           |
| RV <i>NUM1</i> -tag pFA6            | CATATTTATTTTCAGTCACAAAACAAAATTAAGAATTCGTgggcagatgatgtcgagg            |
| FW <i>MFB1</i> -tag pFA6            | TGTAATCAAACGGCTTGACGCTAATACCGATTTTAATATAcggatccccgggtaattaa           |

|                                 |                                                              |
|---------------------------------|--------------------------------------------------------------|
| RV <i>MFB1</i> -tag<br>pFA6     | CGTATAGTAGCTCTTTTTTTGTATCGATTTATAAAAATGCgaattcgagctcgtttaaac |
| FW <i>MFB1</i> -<br>Citrine tag | TGTAATCAAACGGCTTGACGCTAATACCGATTTAATATAggtgacggtgctggttta    |
| RV <i>MFB1</i> -<br>Citrine tag | CGTATAGTAGCTCTTTTTTTGTATCGATTTATAAAAATGCatcgatgaattcgagctcg  |
| FW <i>CIT1</i> tag              | AAAATACAAGGAGTTGGTAAAGAAAATCGAAAGTAAGAACcggtgacggtgctggttta  |
| RV <i>CIT1</i> tag              | TTTGAATAGTCGCATACCCTGAATCAAAAATCAAATTTCCcatcgatgaattcgagctcg |
| FW <i>TOM70</i><br>tag          | TCAAGAACTTTAGCTAAATTACGCGAACAGGGTTTAATGcggtgacggtgctggttta   |
| RV <i>TOM70</i><br>tag          | TTGTCTTCTCCTAAAAGTTTTTAAGTTTATGTTTACTGTcatcgatgaattcgagctcg  |
